# Supplementary material for: Dynamic Stability of Volatile Organic Compounds in Respiratory Air in Schizophrenic Patients and Its Potential Predicting Efficacy of TAAR Agonists
Source: MDPI journal article supplement (doi:10.3390/molecules28114385), 2023-05-27

**Supplementary Table S1.** Mixed Model Analyses in patients and controls. Indicated are the mass concentration presented in means in ppb

|          | <i>HC</i>     |               |               | <i>SZ</i>     |               |               |
|----------|---------------|---------------|---------------|---------------|---------------|---------------|
|          | Measurement 1 | Measurement 2 | Measurement 3 | Measurement 1 | Measurement 2 | Measurement 3 |
| m/z 32   | 13733.43      | 4549.32       | 3524.65       | 11342.26      | 6226.55       | 3952.63       |
| m/z 33 ↓ | 62.82         | 38.98         | 20.84         | 54.64         | 30.60         | 22.36         |
| m/z 35   | 2.03          | 7705.57       | 2.59          | 1.91          | 1.09          | 1.09          |
| m/z 42 ↑ | 30.32         | 25.15         | 20.64         | 125.55        | 167.30        | 178.00        |
| m/z 45   | 239.57        | 131.37        | 98.70         | 212.91        | 135.30        | 110.73        |
| m/z 47   | 132.47        | 830.64        | 322.14        | 240.64        | 163.32        | 127.00        |
| m/z 57   | 31.39         | 39.31         | 30.98         | 50.64         | 44.58         | 38.00         |
| m/z 59 ↓ | 2265.93       | 2173.68       | 2344.93       | 1105.18       | 1330.55       | 1333.00       |
| m/z 60 ↓ | 182.49        | 132.39        | 130.09        | 77.18         | 77.75         | 77.00         |
| m/z 61   | 289.09        | 133.16        | 171.50        | 432.54        | 309.62        | 227.09        |
| m/z 63   | 36.94         | 36.88         | 31.77         | 29.82         | 35.77         | 34.73         |
| m/z 67   | 38.22         | 11.03         | 7.48          | 27.36         | 12.25         | 5.73          |
| m/z 69 ↓ | 370.08        | 299.69        | 213.77        | 196.00        | 200.42        | 155.27        |
| m/z 71   | 11.47         | 8.91          | 8.86          | 37.73         | 31.73         | 10.73         |
| m/z 73   | 13.98         | 10.66         | 10.57         | 27.00         | 18.62         | 17.00         |
| m/z 74 ↑ | 30.87         | 28.10         | 29.20         | 17.27         | 17.47         | 16.27         |
| m/z 79   | 5.09          | 2.57          | 3.14          | 10.36         | 10.00         | 6.36          |
| m/z 87   | 126.77        | 25.11         | 17.91         | 38.91         | 38.08         | 22.55         |
| m/z 89 ↓ | 290.55        | 312.16        | 287.77        | 98.09         | 163.11        | 102.27        |
| m/z 91   | 5.47          | 6.13          | 6.09          | 3.36          | 4.91          | 4.64          |
| m/z 93 ↑ | 2.57          | 0.83          | 3.05          | 6.64          | 4.09          | 3.73          |
| m/z 95   | 708.63        | 890.45        | 854.39        | 586.64        | 792.60        | 896.18        |
| m/z 101  | 3.60          | 3.32          | 2.59          | 2.18          | 2.00          | 2.36          |

Legend: HC= Health control, SZ= Schizophrenic patients

Supplementary Table S2: Shown is the Pearson-correlation with significance level p between the mass m/z 33, 42, 59, 60

|        |                     | m/z 33   | m/z 42   | m/z 59                 | m/z 60                 | m/z 69   | m/z 74                 | m/z 89                 | m/z 93   |
|--------|---------------------|----------|----------|------------------------|------------------------|----------|------------------------|------------------------|----------|
| m/z 33 | Pearson-correlation | 1        | 0.334    | 0.135                  | 0.118                  | 0.378    | 0.243                  | 0.388                  | 0.354    |
|        | p                   |          | 0.000089 | 0.122                  | 0.176                  | 0.000008 | 0.005                  | 0.000004               | 0.000032 |
| m/z 42 | Pearson-correlation | 0.334    | 1        | 0.090                  | 0.055                  | 0.322    | 0.041                  | 0.153                  | 0.392    |
|        | p                   | 0.000089 |          | 0.307                  | 0.535                  | 0.000162 | 0.639                  | 0.080                  | 0.000003 |
| m/z 59 | Pearson-correlation | 0.135    | 0.090    | 1                      | 0.784                  | 0.028    | 0.014                  | 0.011                  | 0.168    |
|        | p                   | 0.122    | 0.307    |                        | 1.0568E <sup>-28</sup> | 0.754    | 0.876                  | 0.897                  | 0.054    |
| m/z 60 | Pearson-correlation | 0.118    | 0.055    | 0.784                  | 1                      | 0.021    | 0.349                  | 0.172                  | 0.078    |
|        | p                   | 0.176    | 0.535    | 1.0568E <sup>-28</sup> |                        | 0.809    | 0.000041               | 0.049                  | 0.371    |
| m/z 69 | Pearson-correlation | 0.378    | 0.322    | 0.028                  | 0.021                  | 1        | 0.282                  | 0.365                  | 0.267    |
|        | p                   | 0.000008 | 0.000162 | 0.754                  | 0.809                  |          | 0.001                  | 0.000017               | 0.002    |
| m/z 74 | Pearson-correlation | 0.243    | 0.041    | 0.014                  | 0.349                  | 0.282    | 1                      | 0.588                  | 0.060    |
|        | P                   | 0.005    | 0.639    | 0.876                  | 0.000041               | 0.001    |                        | 1.1929E <sup>-13</sup> | 0.493    |
| m/z 89 | Pearson-correlation | 0.388    | 0.153    | 0.011                  | 0.172                  | 0.365    | 0.588                  | 1                      | 0.194    |
|        | P                   | 0.000004 | 0.080    | 0.897                  | 0.049                  | 0.000017 | 1.1929E <sup>-13</sup> |                        | 0.026    |
| m/z 93 | Pearson-correlation | 0.354    | 0.392    | 0.168                  | 0.078                  | 0.267    | 0.060                  | 0.194                  | 1        |
|        | p                   | 0.000032 | 0.000003 | 0.054                  | 0.371                  | 0.002    | 0.493                  | 0.026                  |          |

T,

Supplementary Table S3 Preselected VOCs for analysis

|                                    |                  |    |
|------------------------------------|------------------|----|
| NH <sub>3</sub>                    | Ammonia          | 18 |
| CH <sub>2</sub> CO                 | Ketene           | 31 |
| O <sub>2</sub>                     | Oxygen           | 32 |
| H <sub>2</sub> S                   | Hydrogen Sulfide | 35 |
| H <sub>2</sub> O                   | Water            | 19 |
| C <sub>2</sub> H <sub>3</sub> N    | Acetonitrile     | 42 |
| CO <sub>2</sub>                    | Carbon Dioxide   | 45 |
| C <sub>2</sub> H <sub>4</sub> O    | Acetaldehyde     | 45 |
| CH <sub>2</sub> O <sub>2</sub>     | Formic Acid      | 47 |
| C <sub>2</sub> H <sub>5</sub> OH   | Ethanol          | 47 |
| C <sub>3</sub> H <sub>4</sub> O    | Acrolein         | 57 |
| (CH <sub>3</sub> ) <sub>2</sub> CO | Acetone          | 59 |
| N(CH <sub>3</sub> ) <sub>3</sub>   | Trimethylamine   | 60 |
| CH <sub>3</sub> COOH               | Acetic Acid      | 61 |
| C <sub>3</sub> H <sub>8</sub> O    | Isopropanol      | 61 |
| CH <sub>3</sub> CH <sub>2</sub> SH | Ethanethiol      | 63 |
| C <sub>5</sub> H <sub>6</sub>      | Cyclopentadien   | 67 |
| C <sub>4</sub> H <sub>4</sub> O    | Furan            | 69 |
| C <sub>5</sub> H <sub>8</sub>      | Isoprene         | 69 |

|                                                                   |                    |     |
|-------------------------------------------------------------------|--------------------|-----|
| C <sub>4</sub> H <sub>6</sub> O                                   | Crotonaldehyde     | 71  |
| C <sub>5</sub> H <sub>10</sub>                                    | Penten             | 71  |
| C <sub>4</sub> H <sub>8</sub> O                                   | Butanone           | 73  |
| CH <sub>3</sub> (CH <sub>2</sub> ) <sub>3</sub> NH <sub>2</sub>   | N-Butylamine       | 74  |
| C <sub>6</sub> H <sub>6</sub>                                     | Benzol             | 79  |
| C <sub>4</sub> H <sub>6</sub> O <sub>2</sub>                      | γ-Butyrolactone    | 87  |
| C <sub>5</sub> H <sub>10</sub> O                                  | 2- Pentanone       | 87  |
| C <sub>4</sub> H <sub>8</sub> S                                   | Tetrahydrothiophen | 89  |
| C <sub>4</sub> H <sub>8</sub> O <sub>2</sub>                      | Ethylacetate       | 89  |
| CH <sub>3</sub> CH <sub>2</sub> CH <sub>2</sub> CO <sub>2</sub> H | Butyric Acid       | 90  |
| C <sub>4</sub> H <sub>10</sub> S                                  | 2- Butanethiol     | 91  |
| C <sub>7</sub> H <sub>8</sub>                                     | Toluol             | 93  |
| C <sub>6</sub> H <sub>6</sub> O                                   | Phenol             | 95  |
| C <sub>5</sub> H <sub>8</sub> O <sub>2</sub>                      | Acetylacetone      | 101 |
| C <sub>6</sub> H <sub>12</sub> O                                  | Hexanal            | 101 |
| C <sub>10</sub> H <sub>16</sub>                                   | Adamantan          | 137 |

**Supplementary Figure S1. Dynamic change of concentration of mass m/z 95** Shown is the average concentration of mass m/z 95 at the three different measurement time points over a 14-day time course. A significant awakening effect was detected.

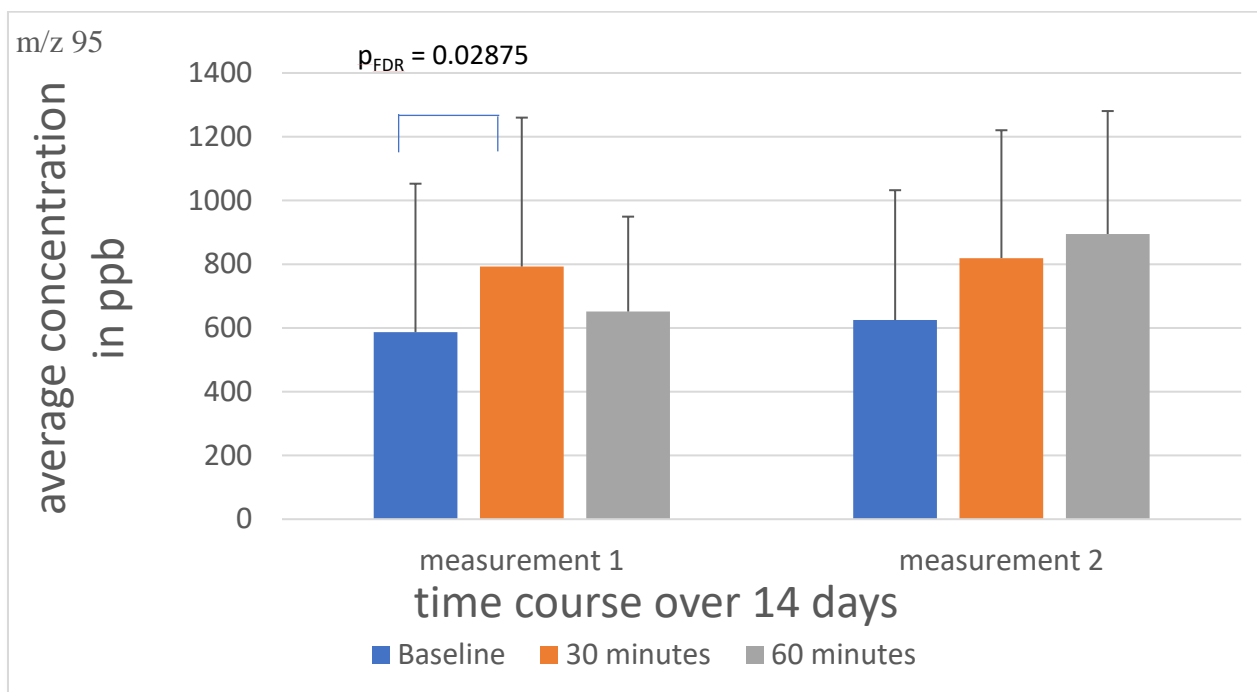

**Supplementary Figure S2. Association between olanzapine equivalents and concentration of m/z 71** Shown is the Pearson-Correlation between the average concentration of mass m/z 71 and the olanzapine equivalents.

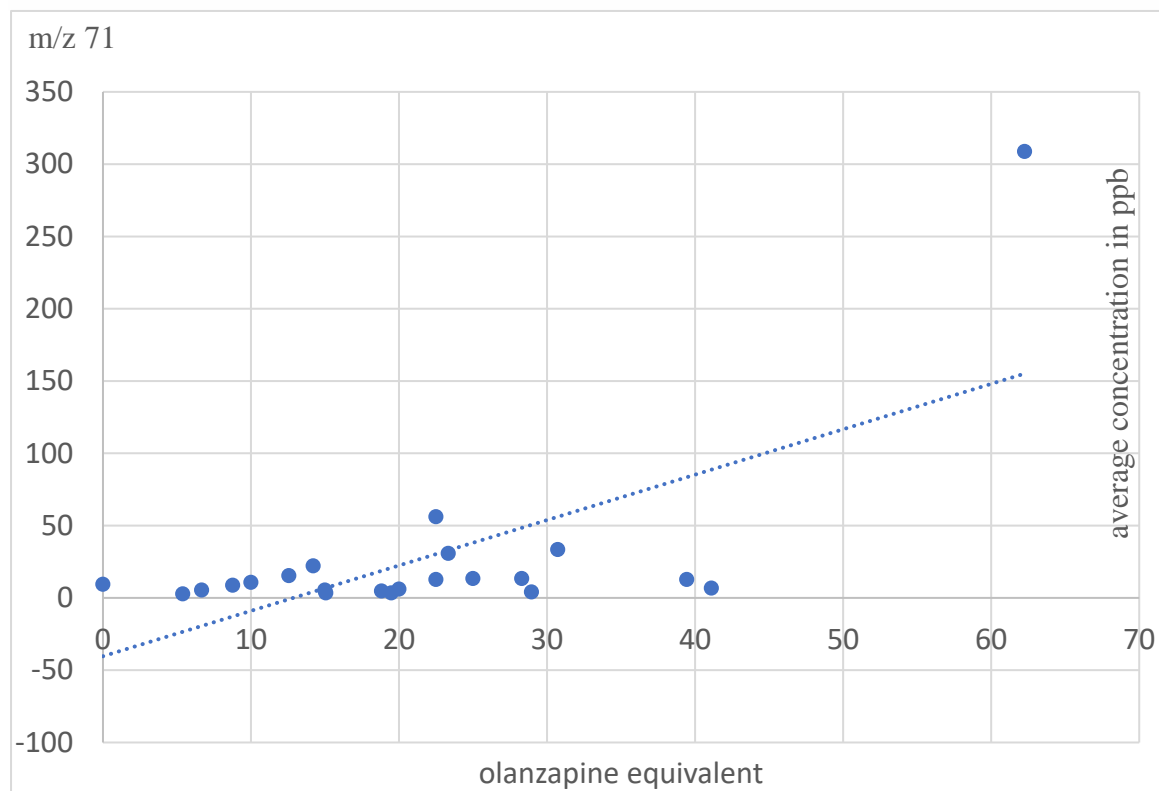

**Supplementary Figure S3. Association between olanzapine equivalents and concentration of m/z 73** Shown is the Pearson-Correlation between the average concentration of mass m/z 73 and the olanzapine equivalents.

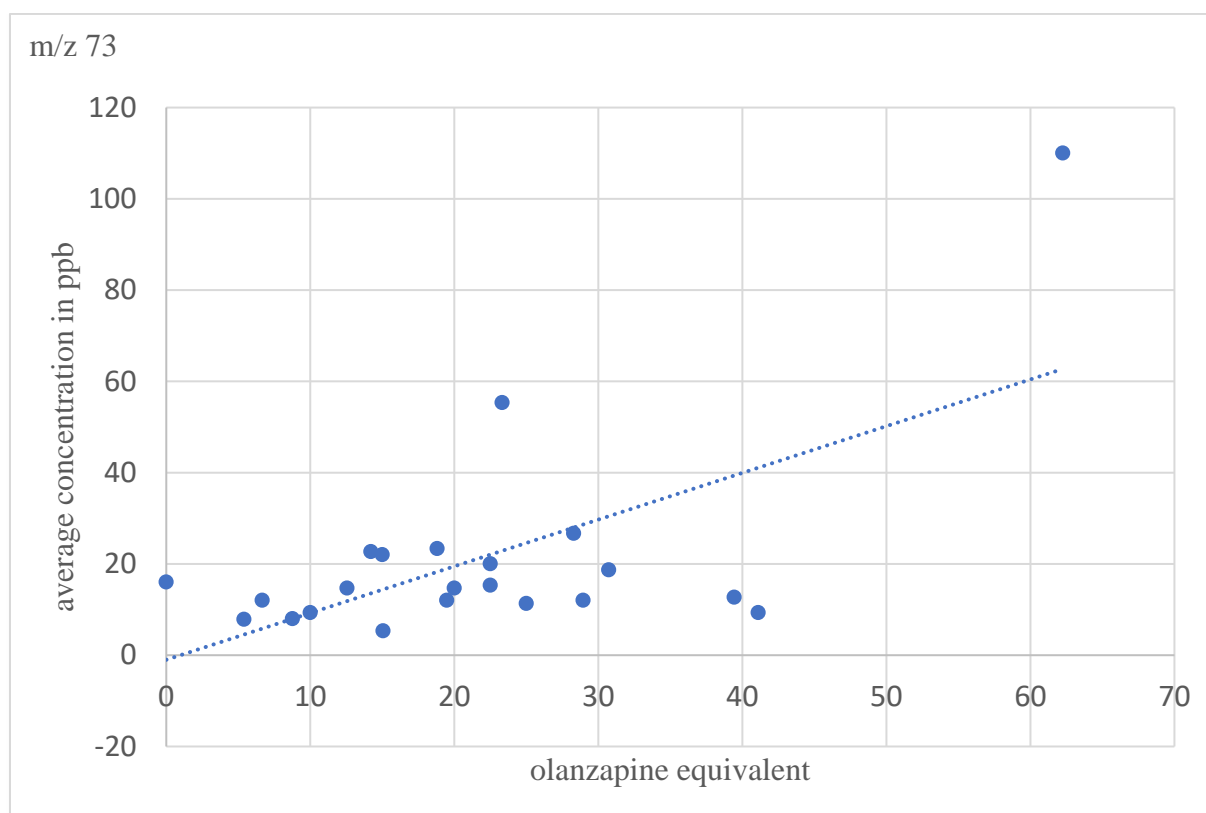

**Supplemental Figure 4.** Shown is the Pearson-Correlation between the average concentration of mass  $m/z$  79 and the olanzapine equivalents.

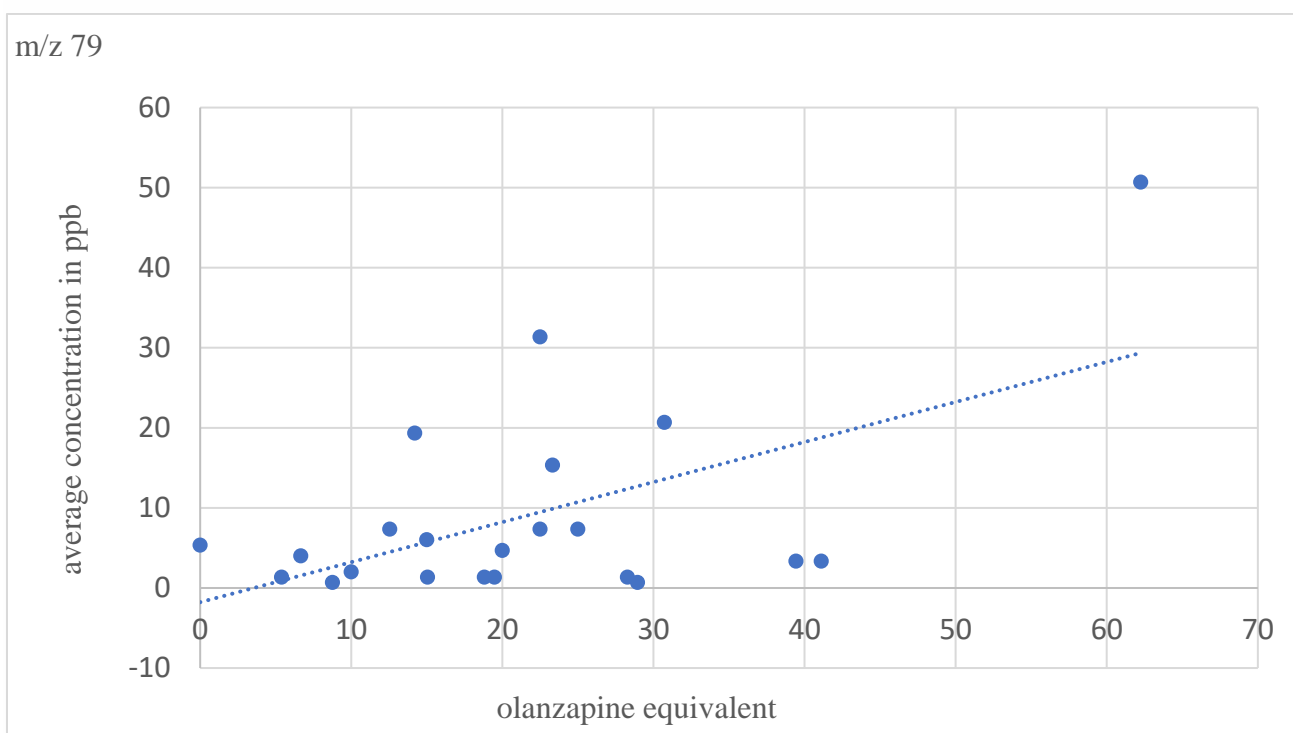

Supplement: s1 [file s1]
